# Supplementary material
Source: ML conference proceedings conference paper supplement (https://aclanthology.org/D18-1372)
Supplement: Attachment [file EMNLP_Supplemental_Ver1.pdf › EMNLP_Supplemental_Ver1.pdf]

## A Supplemental Material

### A.1 Model Performances in the Original Facebook Dataset (Without Anonymization)

Model performances in the main paper were based on the anonymized dataset (see 1). Here, we show results on the original, non-anonymized data (i.e. without named entities and dates removed). These models are trained with the original dataset and used for the pipeline application for the exploration in Facebook (Kosinski et al., 2013) and Yelp review dataset (Zhang et al., 2015).

### A.2 Performances on Validation Dataset

We also report the validation F1s of the optimized model for each subtask performance of the complete pipeline: the feature-based models in causality prediction (CP) and the LSTM variants in causal explanation identification (CEI). We saw the same pattern of results comparing LSTMs but the ablation analyses were not as conclusive. We note that our hyper-parameters were optimized over the validation set and therefore these results, as opposed to those in the main paper, might be slightly overfit.

## References

- Or Biran and Kathleen McKeown. 2015. Pdtb discourse parsing as a tagging task: The two taggers approach. In *Proceedings of the 16th Annual Meeting of the Special Interest Group on Discourse and Dialogue*, pages 96–104.
- Michal Kosinski, David Stillwell, and Thore Graepel. 2013. Private traits and attributes are predictable from digital records of human behavior. *Proceedings of the National Academy of Sciences*, 110(15):5802–5805.
- Ziheng Lin, Hwee Tou Ng, and Min-Yen Kan. 2014. A pdtb-styled end-to-end discourse parser. *Natural Language Engineering*, 20(02):151–184.
- Xiang Zhang, Junbo Zhao, and Yann LeCun. 2015. Character-level convolutional networks for text classification. In *Advances in neural information processing systems*, pages 649–657.

| Tags                    | Contents                                                |
|-------------------------|---------------------------------------------------------|
| ANONYMIZED_ALPHANUMERIC | phone numbers with '-', user names on websites, etc     |
| ANONYMIZED_AMOUNT       | specific amount of money or other quantities            |
| ANONYMIZED_DATE         | specific dates for anniversaries, etc: month, day, year |
| ANONYMIZED_LOCATION     | specific locations for travels, hometown, etc           |
| ANONYMIZED_NAME         | names of people, streets, buildings, etc                |
| ANONYMIZED_NUMBER       | street numbers of addresses, phone numbers, etc         |
| ANONYMIZED_TIME         | specific time for events such as meetings, parties, etc |
| ANONYMIZED_URL          | URLs for personal websites, games, etc                  |

Table 1: Anonymization tags which were used in our anonymized dataset

| Causality Messages | CE DA | Total DA |
|--------------------|-------|----------|
| Training           | 1,278 | 5,609    |
| Validation         | 160   | 653      |
| Test               | 160   | 759      |
| Total              | 1,598 | 7,021    |

Table 2: The number of discourse arguments in the original causality messages.

| Model       | CP (F1) | CEI (F1) |
|-------------|---------|----------|
| Full LSTM   | 0.743   | 0.861    |
| DA AVG LSTM | 0.738   | 0.808    |
| Word LSTM   | 0.655   | 0.802    |

Table 6: The effect of Word-level LSTM for causality prediction (CP) and causal explanation identification (CEI) in the original CEI test set.

| Model                     | F1           |
|---------------------------|--------------|
| (Biran and McKeown, 2015) | 0.434        |
| (Lin et al., 2014)        | 0.640        |
| Linear SVM                | <b>0.788</b> |
| RBF SVM                   | 0.743        |
| Random Forest             | 0.783        |
| LSTM                      | 0.743        |

Table 3: Causality prediction performance across different predictive models. Bold indicates significant improvement over the LSTM.

| Model                      | Prec         | Rec          | F1           |
|----------------------------|--------------|--------------|--------------|
| CP + CEI <sub>causal</sub> | <b>0.870</b> | <b>0.883</b> | <b>0.873</b> |
| CP + CEI <sub>all</sub>    | 0.854        | 0.875        | 0.856        |
| CEI <sub>causal</sub> Only | 0.851        | 0.795        | 0.815        |
| CEI <sub>all</sub> Only    | 0.842        | 0.853        | 0.847        |

Table 7: The effect of DA-Level LSTM for causal explanation identification. Bold: significant ( $p < .05$ ) increase in F1 over the next best model.

| Model                   | F1    |
|-------------------------|-------|
| All                     | 0.788 |
| - First-Last, First3    | 0.790 |
| - Word Pairs            | 0.806 |
| - POS tags              | 0.746 |
| - (Char + Word) N-grams | 0.756 |
| - Sentiment tags        | 0.788 |

Table 4: Feature ablation test of Linear SVM for causality prediction

| Model                   | A F1  | O F1  |
|-------------------------|-------|-------|
| All                     | 0.760 | 0.767 |
| - First-Last, First3    | 0.765 | 0.767 |
| - Word Pairs            | 0.764 | 0.757 |
| - POS tags              | 0.746 | 0.723 |
| - (Char + Word) N-grams | 0.778 | 0.776 |
| - Sentiment tags        | 0.757 | 0.767 |

Table 8: Feature ablation test of Linear SVM for the causality prediction (CP) on the validation sets of the anonymized dataset (A) and the original dataset (O)

| Model         | Prec  | Rec   | F1    |
|---------------|-------|-------|-------|
| Linear SVM    | 0.767 | 0.733 | 0.746 |
| RBF SVM       | 0.756 | 0.771 | 0.762 |
| Random Forest | 0.754 | 0.793 | 0.752 |
| LSTM          | 0.859 | 0.864 | 0.861 |

Table 5: Causal explanation identification performance.

| Model       | A F1  | O F1  |
|-------------|-------|-------|
| Full LSTM   | 0.846 | 0.851 |
| DA AVG LSTM | 0.813 | 0.815 |
| Word LSTM   | 0.765 | 0.766 |

Table 9: The validation F1s of the architectural variants of the causal explanation identification (CEI) LSTMs.
